# Supplementary material for: Determination of free chlorine based on ion chromatography—application of glycine as a selective scavenger
Source: Springer Nature journal article supplement (doi:10.1007/s00216-020-02885-1), 2020-09-18
Supplement: MOESM1 [file 216_2020_2885_MOESM1_ESM.pdf]

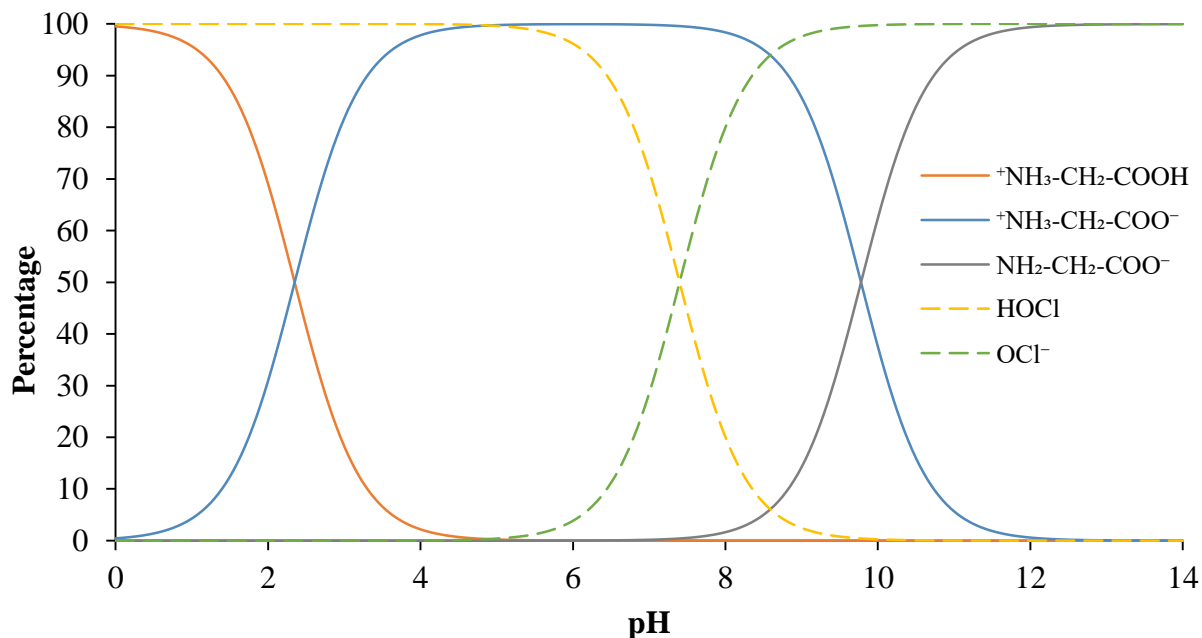

19  
 20 *Figure S 1 Speciation of glycine and hypochlorous acid,  $pK_{a(\text{glycine carboxyl})} = 2.35$ ,  $pK_{a(\text{glycine amino})} = 9.78$ ,  $pK_{a(\text{HOCl})} = 7.4$  (1)*

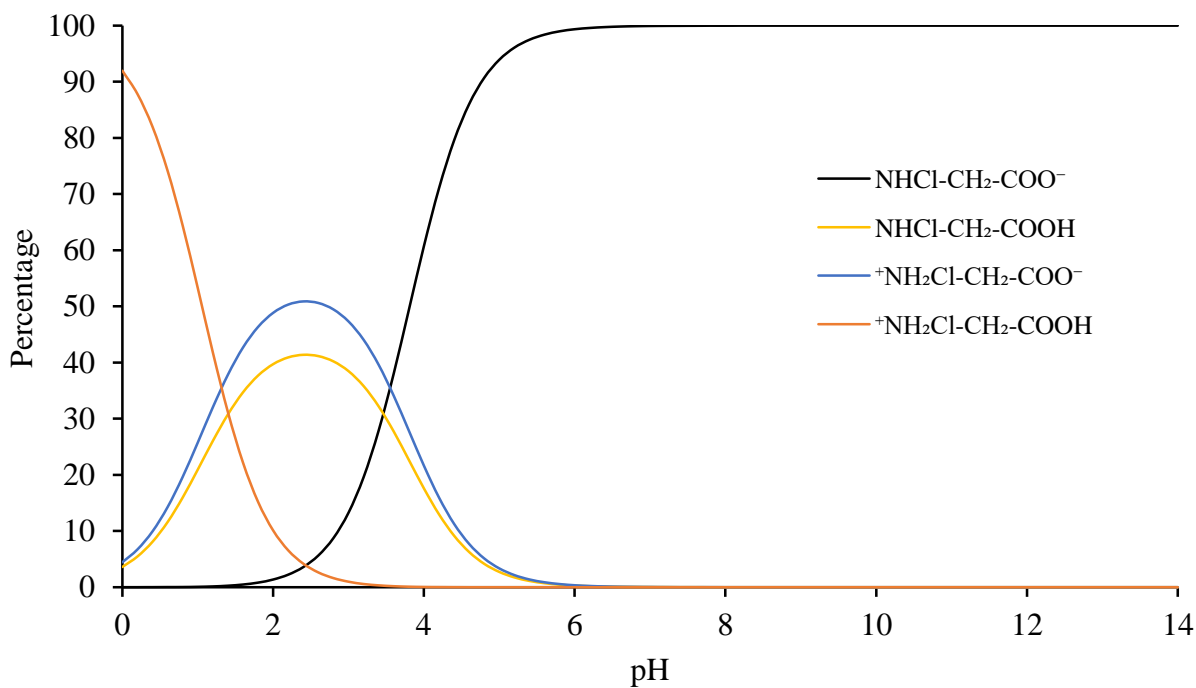

22  
 23 *Figure S 2 Speciation of N-chloroglycine calculated by calculator Plugins MarvinSketch 19.3.0,*  
 24 *2019, ChemAxon (<http://www.chemaxon.com>) showing a  $pK_a$  of 1.06 for carboxyl and 3.81 for*  
 25 *amino group*

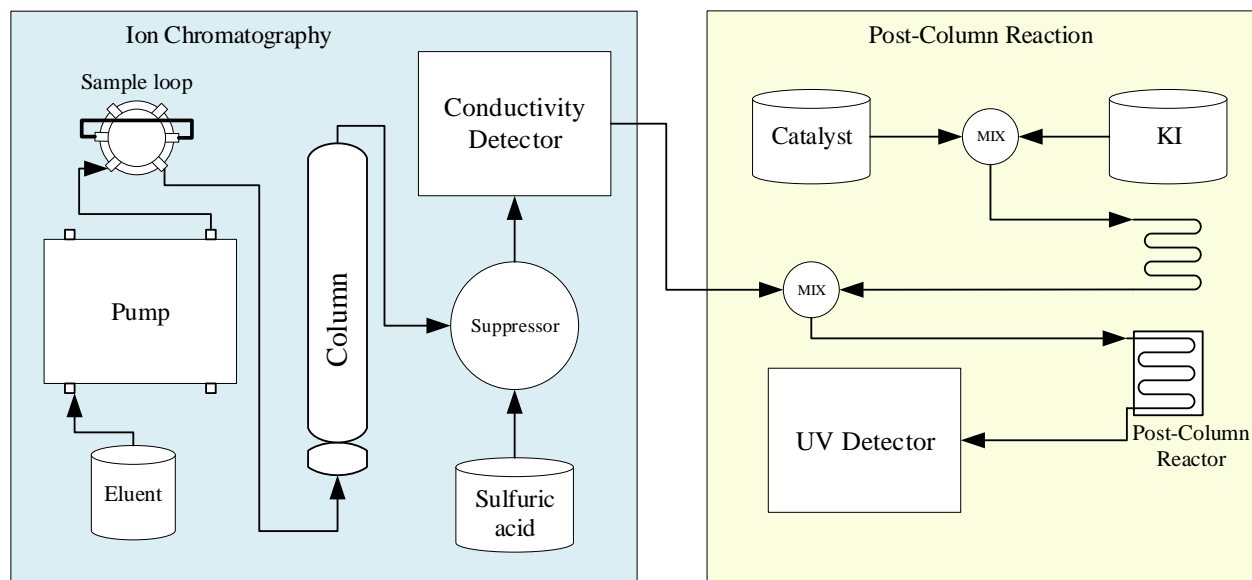

26  
 27 *Figure S3 Schematic view of the IC and PCR system. Eluent: 1.6 mmol L<sup>-1</sup> sodium carbonate,*  
 28 *flowrate of 0.8 mL min<sup>-1</sup>, PCR: [KI] = 270 mmol L<sup>-1</sup>, [ammonium molybdate tetrahydrate] =*  
 29 *50 μmol L<sup>-1</sup>, [sulfuric acid] = 100 mmol L<sup>-1</sup>, KI was added separately, flowrate of PCR reagents*  
 30 *0.2 mL min<sup>-1</sup>, wavelength of UV-detection: 352 nm, injection volume 300 μL*

31  
 32  
 33  
 34  
 35

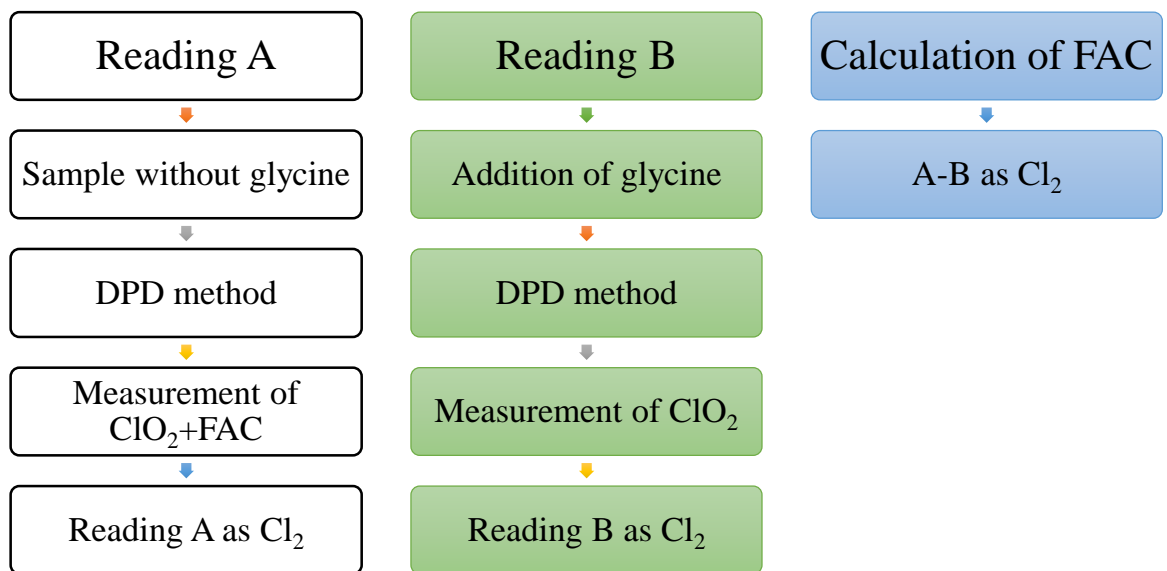

36

37 *Figure S4 A graphical representation of DPD procedure for measurement of FAC in the presence*  
 38 *of ClO<sub>2</sub>*

39

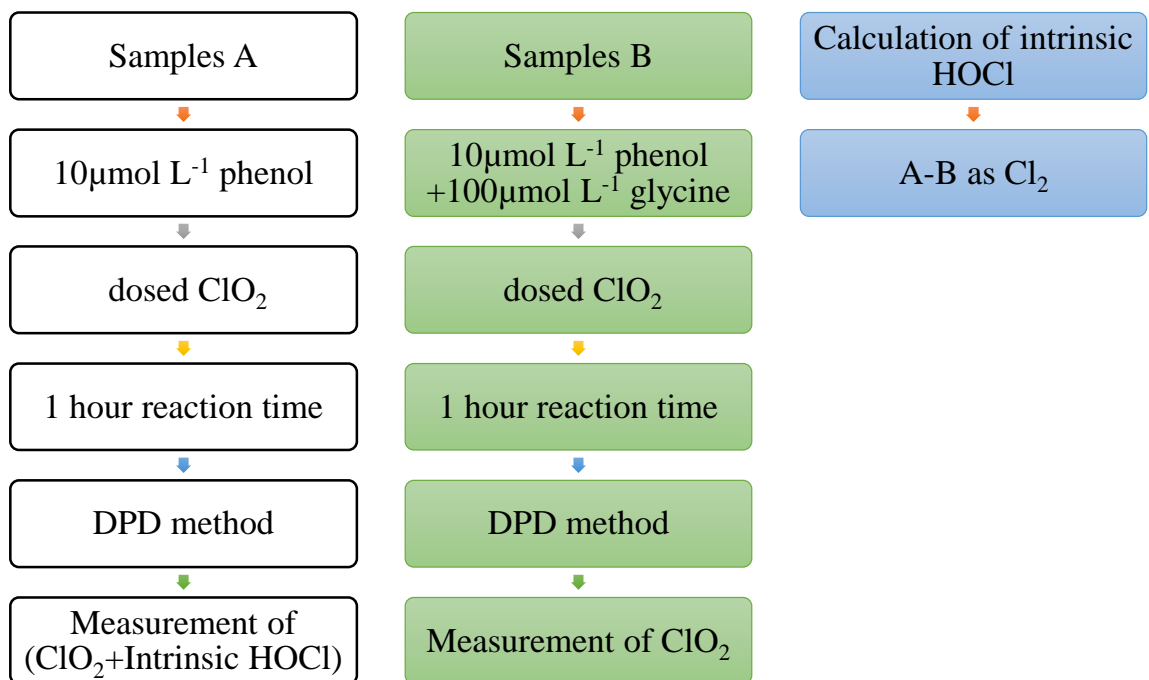

40

41 *Figure S5 A graphical representation of DPD procedure for measurement of intrinsic HOCl*  
 42 *formed in the reaction of ClO<sub>2</sub>*

43

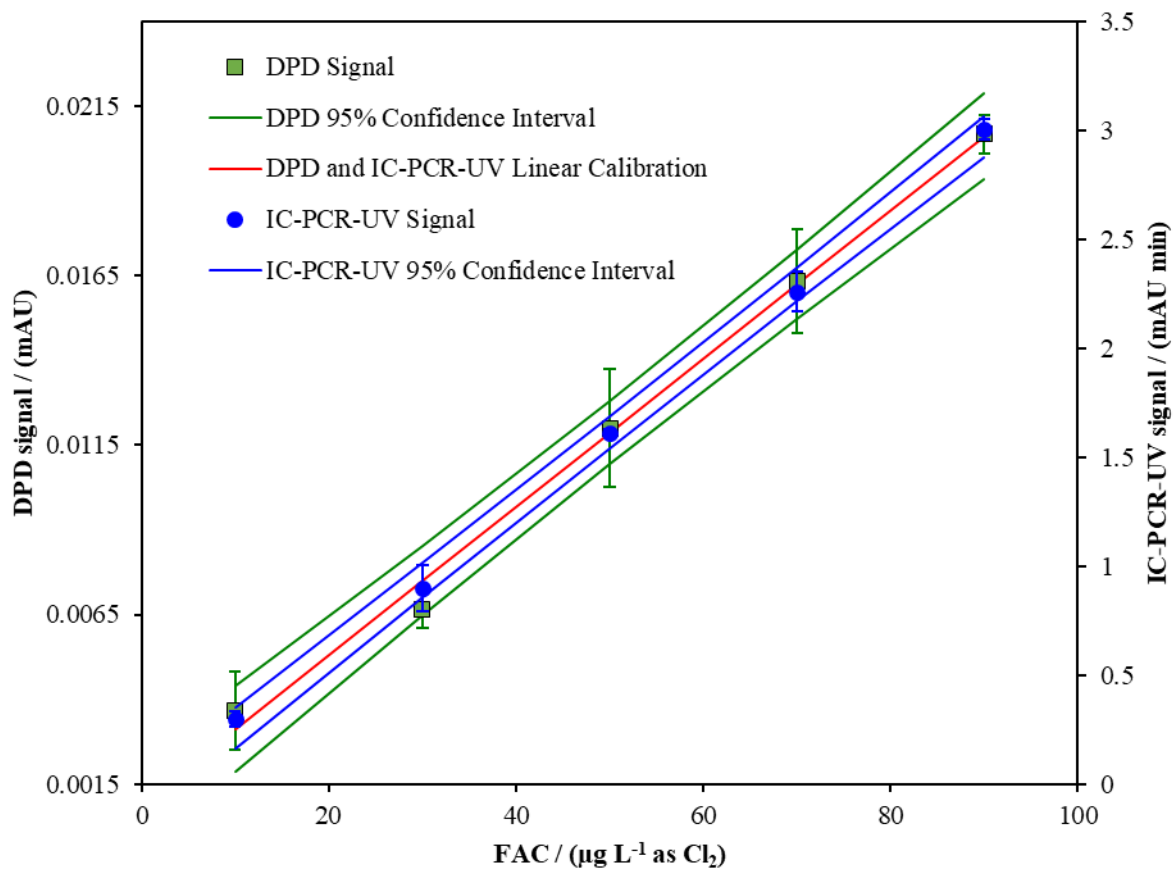

44

45 *Figure S 6 Calibration and 95% confidence intervals for DPD and IC-PCR-UV methods. Error*  
 46 *bars show the standard deviation of triplicate measurements. (FAC=added HOCl, expressed as*  
 47 *Cl<sub>2</sub> equivalents)*

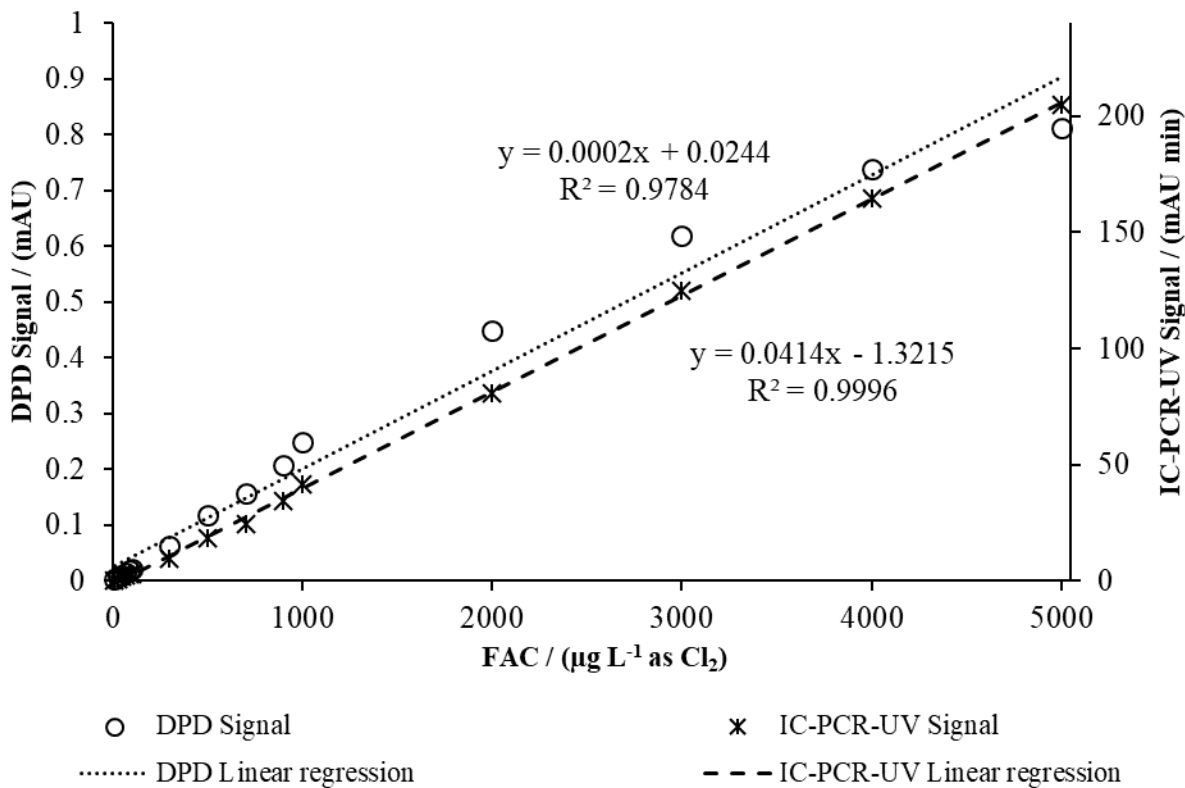

48

49 *Figure S7 Calibration of FAC using DPD and IC-PCR-UV method. Different concentrations of*  
 50 *FAC in ultrapure water are measured with DPD and N-chloroglycine methods.*

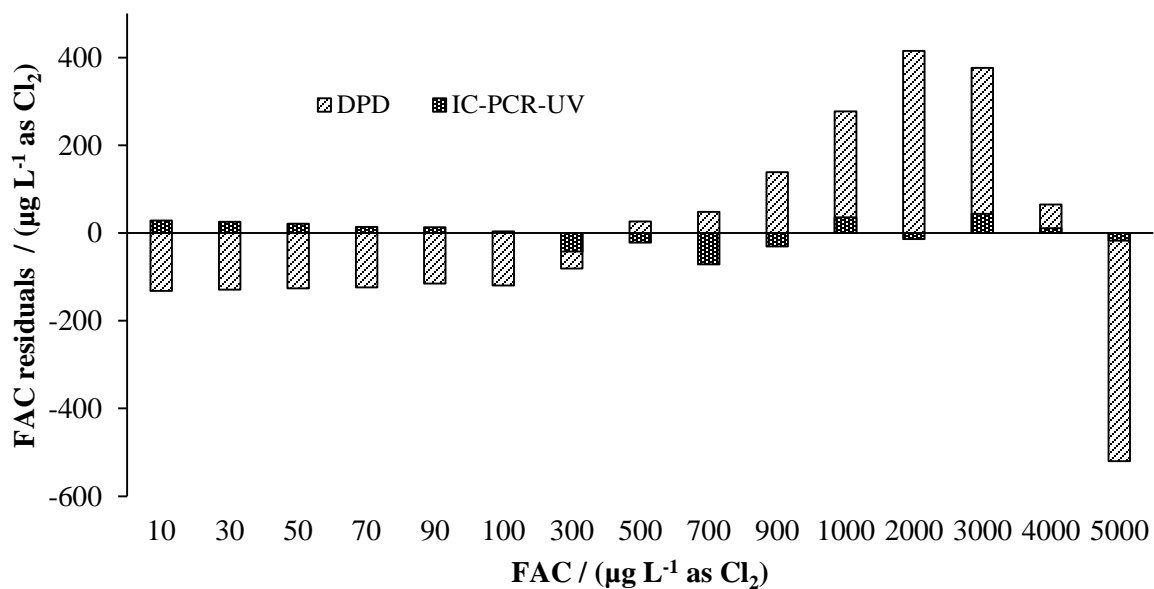

51

52 *Figure S8 Residuals of linear regression for DPD and IC-PCR-UV methods. (FAC = added HOCl,*  
 53 *expressed as Cl<sub>2</sub> equivalents)*

54

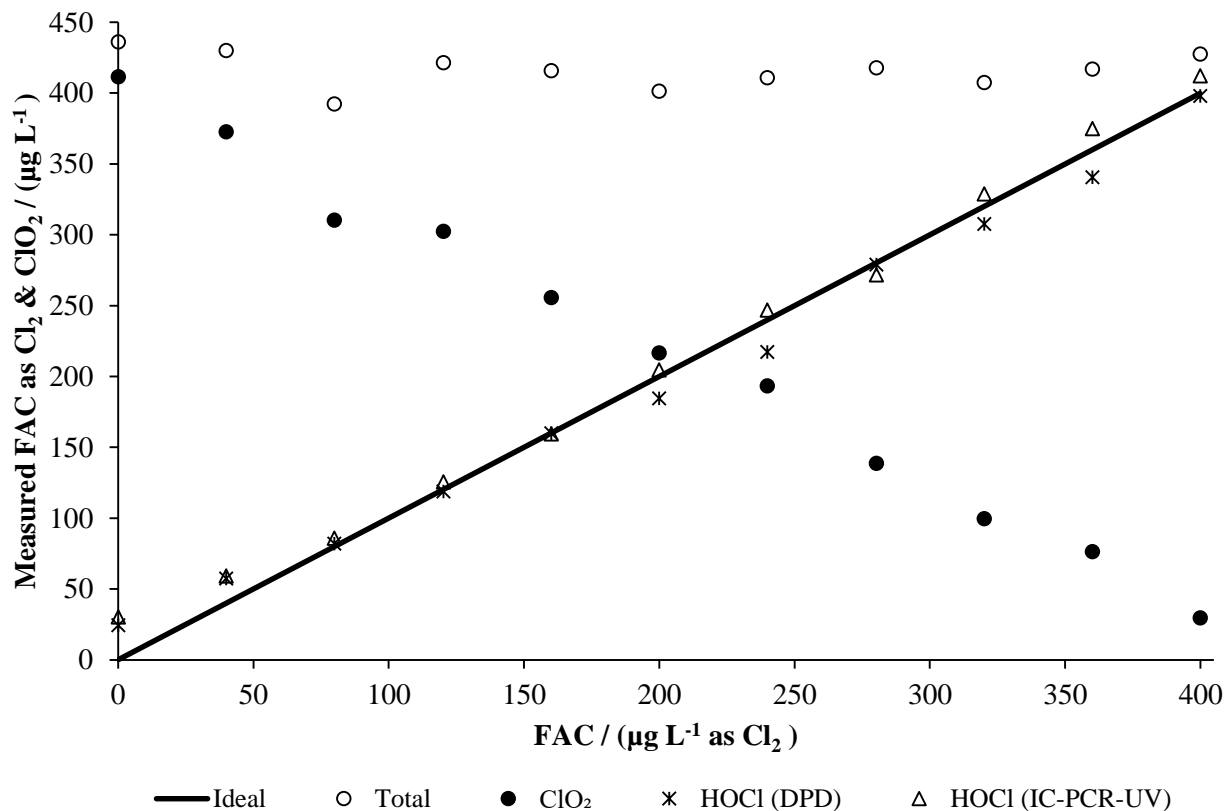

56 *Figure S 9 Performance of DPD and N-chloroglycine method (IC-PCR-UV) for FAC measurement*  
 57 *in the presence of ClO<sub>2</sub>. To measure FAC by DPD method, “scavenged” samples (ClO<sub>2</sub>) are*  
 58 *subtracted from “not scavenged” samples (ClO<sub>2</sub> + HOCl). Different concentrations of FAC*  
 59 *ranging from 0 to 400 µg L<sup>-1</sup> are mixed with different ClO<sub>2</sub> concentration with 400 µg L<sup>-1</sup> being*  
 60 *the sum of FAC and ClO<sub>2</sub> (FAC = added HOCl, expressed as Cl<sub>2</sub> equivalents)*

61

62

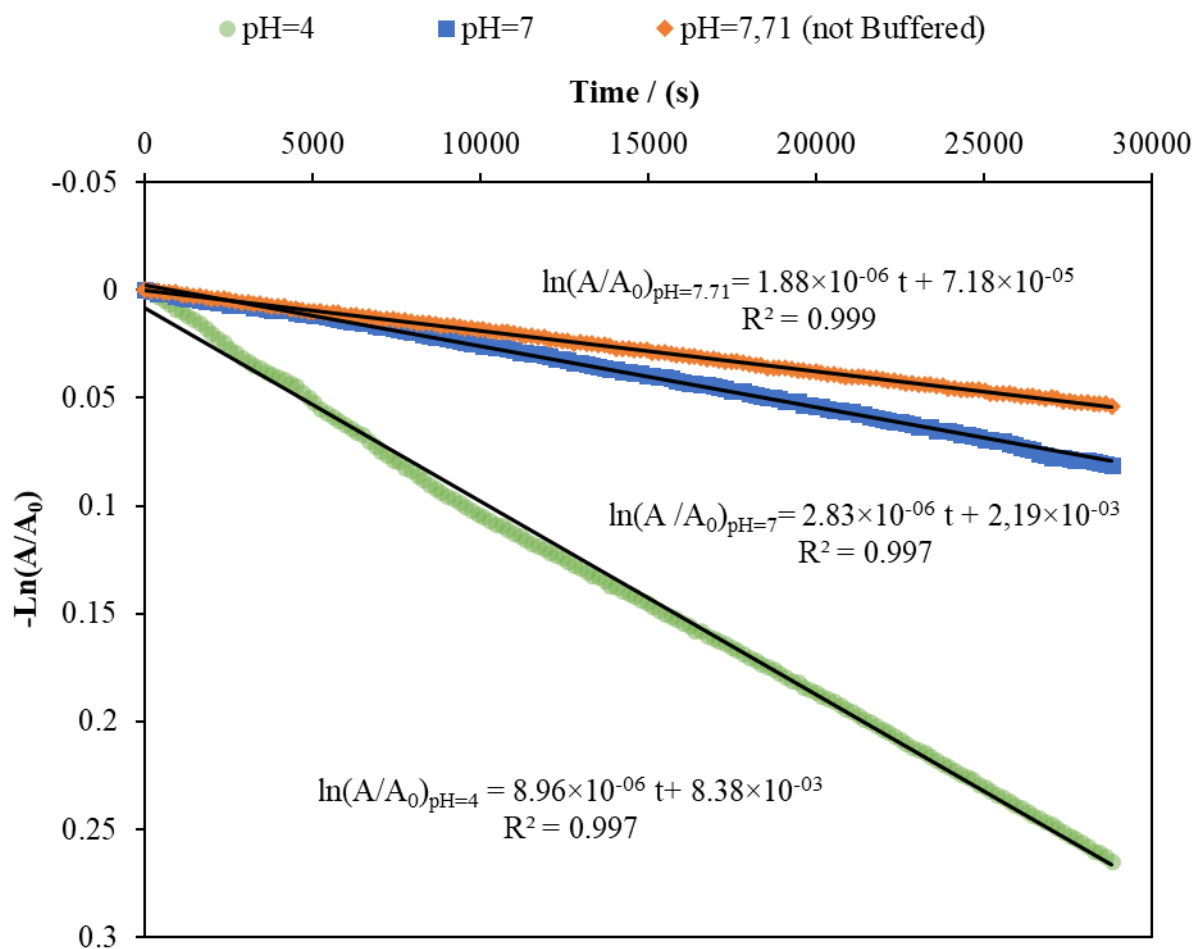

63

64 *Figure S10 First order decomposition of N-chloroglycine at different pH values,*  
 65 *[N-chloroglycine]<sub>0</sub> = 100 μmol L<sup>-1</sup>, [phosphate buffer] = 5 mmol L<sup>-1</sup>*

66

67

68

69

70

71

72

73



74 *Table S1 Anions of the water matrix measured alongside FAC in spiked tap water samples using*  
75 *N-chloroglycine method (IC-CD); Water sample taken at the University of Duisburg-Essen on*  
76 *August 24, 2018 with a pH of 7.80.*

| <b>Anion</b>               | <b>Fluoride</b><br><i>/ (µg L<sup>-1</sup>)</i> | <b>Chloride</b><br><i>/ (mg L<sup>-1</sup>)</i> | <b>Bromide</b><br><i>/ (µg L<sup>-1</sup>)</i> | <b>Nitrate</b><br><i>/ (mg L<sup>-1</sup>)</i> | <b>Sulfate</b><br><i>/ (mg L<sup>-1</sup>)</i> |
|----------------------------|-------------------------------------------------|-------------------------------------------------|------------------------------------------------|------------------------------------------------|------------------------------------------------|
| <b>Concentration</b>       | 133                                             | 63.3                                            | 114                                            | 4.69                                           | 33.0                                           |
| <b>Confidence interval</b> | ± 2                                             | ± 0.2                                           | ± 4                                            | ± 0.02                                         | ± 0.3                                          |
| <b>Precision</b>           | 0.985                                           | 0.996                                           | 0.966                                          | 0.996                                          | 0.99                                           |

77

78

79

80

81

82

83

84

85

86

87

88

89

90

91

92

93

94

## Text S1: Measurement of monochloramine by modified system

95 Due to the absence of anionic species for monochloramine and the presence of the conjugate  
96 acid to some extent ( $pK_a = 1.44$  (2), Figure S11), monochloramine will not pass the ion suppressor.  
97 To selectively determine monochloramine in water samples, ion suppressor and conductivity  
98 detector can be bypassed. By using the PCR-UV detection, a separation-based quantification can  
99 be performed with this setup. This can selectively determine monochloramine and other ions that  
100 are capable of oxidizing iodide (e.g., chlorite, chlorate). The result from such set up is shown in  
101 Figure S12 and Figure S13. Due to the fact that this system cannot measure most conservative  
102 anions and needs higher skill levels to operate compared to cheaper methods already introduced to  
103 determine monochloramine, everyday use of such a system is not endorsed. However, it can be  
104 used to validate the performance of other methods for chloramine determination.

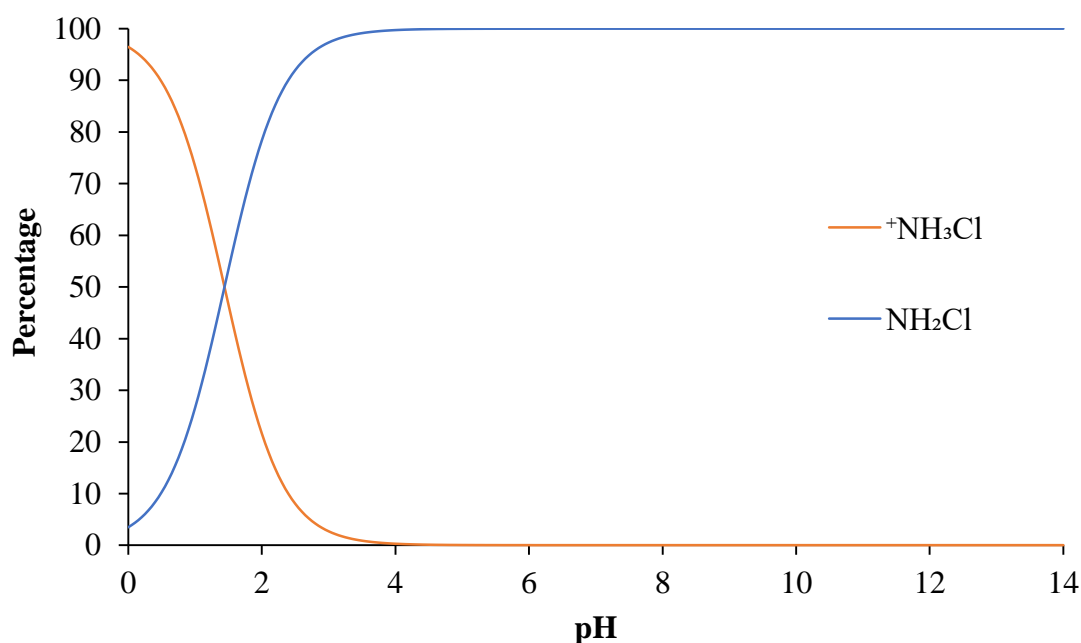

105

106

Figure S11 Speciation of monochloramine,  $pK_a = 1.44$  (2)

107

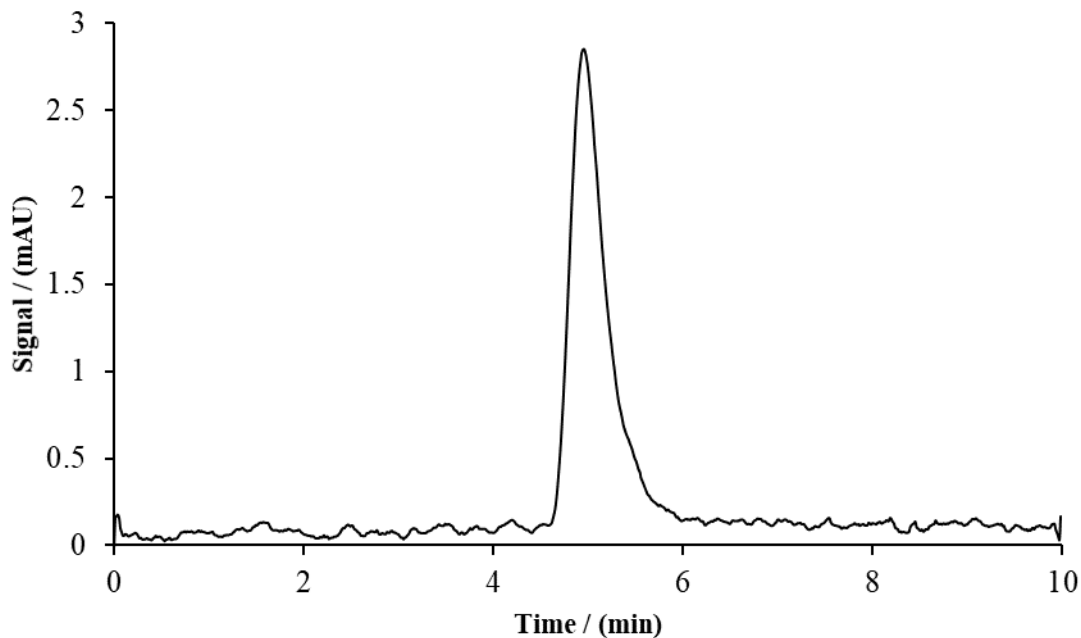

108  
 109 *Figure S12 Chromatogram for separation of  $5\mu\text{mol L}^{-1}$  monochloramine in IC-PCR-UV;*  
 110 *separation column A Supp 4; Eluent  $1.6\text{ mmol L}^{-1}\text{ Na}_2\text{CO}_3+0.1\text{ mmol L}^{-1}\text{ NaHCO}_3$ ; Flowrate  $1$*   
 111  *$\text{mL min}^{-1}$ ; Sample loop  $20\mu\text{L}$*

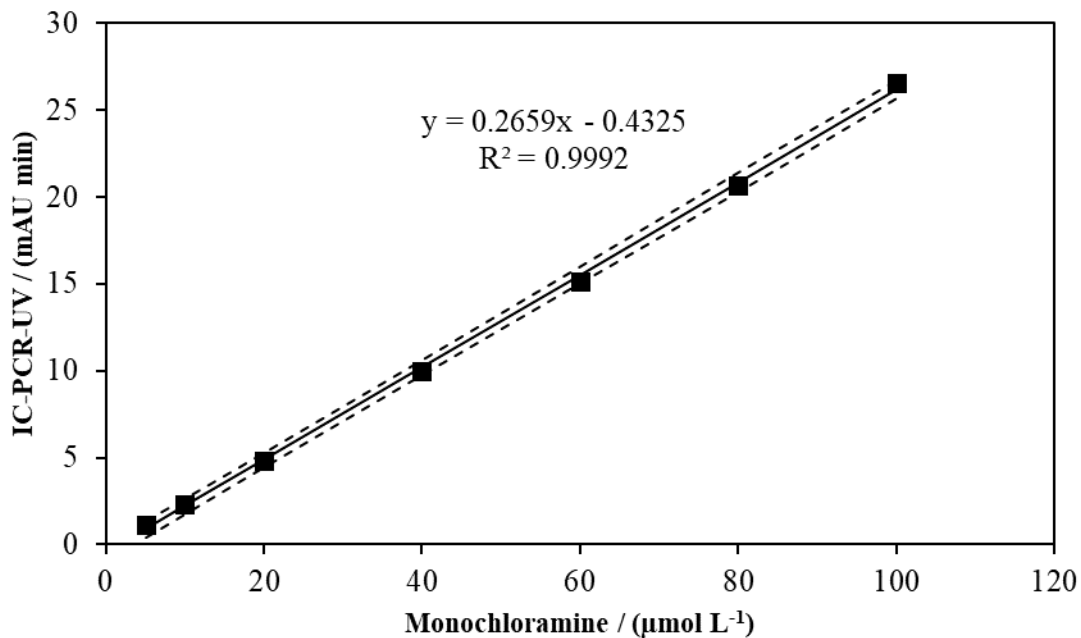

112  
 113 *Figure S13 Calibration of monochloramine determined by IC-PCR-UV; separation column A*  
 114 *Supp 4; Eluent  $1.6\text{ mmol L}^{-1}\text{ Na}_2\text{CO}_3+0.1\text{ mmol L}^{-1}\text{ NaHCO}_3$ ; Flowrate  $1\text{ mL min}^{-1}$ ; Sample loop*  
 115  *$20\mu\text{L}$*

117 Text S2: *N*-chloroglycine decomposition

118 As all chloramines, *N*-chloroglycine is inherently unstable and decomposes according to  
119 Equations S1 and S2 (3–5).

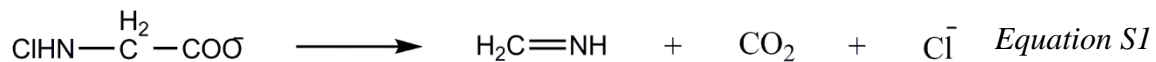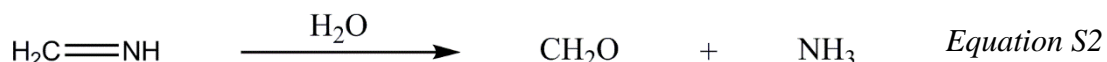

120 The most critical parameter affecting the stability of *N*-chloroglycine is pH (6,7). Therefore,  
121 the kinetics of *N*-chloroglycine decomposition was determined in different pH values for assessing  
122 the stability of samples to be measured by the *N*-chloroglycine method (Figure S10). The other  
123 factor of importance is the presence of hydrogen carbonate or any other naturally occurring proton  
124 donor, such as hydrogen phosphate (8). These compounds are acid catalysts and play a role in the  
125 disproportionation reaction of chloramines.

126 The presence of the  $\alpha$ -hydrogen in glycine can promote dehydrohalogenation. However, it  
127 seems that *N*-chloroglycine is relatively stable compared with other organic chloramines (9). A  
128 possible reason can be the absence of the alkane group in the  $\alpha$ -carbon for glycine as the simplest  
129 amino acid. Organic chloramines such as *N*-chloroglycine can also undergo thermal decomposition  
130 (10), and the decomposition rate will decrease a lot at lower temperatures (6,7).

131

132

133

134

135  
136  
137  
138  
139  
140  
141  
142  
143  
144  
145  
146  
147  
148  
149  
150  
151  
152  
153  
154  
155  
156  
157  
158  
159  
160  
161  
162  
163  
164  
165  
166

## References

1. Lide DR. CRC Handbook of Chemistry and Physics. 90th ed. Boca Raton, Florida: CRC Press; 2010.
2. MARGERUM DW, GRAY ET, HUFFMAN RP. Chlorination and the Formation of N -Chloro Compounds in Water Treatment. In: ACS Symposium Series [Internet]. 1979. p. 278–91. Available from: <http://pubs.acs.org/doi/book/10.1021/bk-1978-0082>
3. Andrés J, Queralt JJ, Safont VS, Canle L M, Santaballa JA. Unimolecular Decomposition of the Anionic Form of N -Chloro- $\alpha$ -glycine. A Theoretical Study. J Phys Chem [Internet]. 1996 Jan;100(9):3561–8. Available from: <http://pubs.acs.org/doi/abs/10.1021/jp9517209>
4. Patai S. Amino, Nitroso and Nitro Compounds and Their Derivatives: Vol. 1 (1982) [Internet]. Patai S, editor. Chichester, UK: John Wiley & Sons, Ltd.; 1982. 1438 p. Available from: <http://doi.wiley.com/10.1002/9780470771662>
5. Szabó M, Baranyai Z, Somsák L, Fábíán I. Decomposition of N -Chloroglycine in Alkaline Aqueous Solution: Kinetics and Mechanism. Chem Res Toxicol [Internet]. 2015 Jun 15;28(6):1282–91. Available from: <https://pubs.acs.org/doi/10.1021/acs.chemrestox.5b00084>
6. Vikesland PJ, Ozekin K, Valentine RL. Monochloramine decay in model and distribution system waters. Water Res. 2001;35(7):1766–76.
7. Valentine RL, Jafvert CT, Leung SW. Evaluation of a chloramine decomposition model incorporating general acid catalysis. Water Res [Internet]. 1988 Sep;22(9):1147–53. Available from: <https://linkinghub.elsevier.com/retrieve/pii/0043135488900103>
8. Antelo JM, Arce F, Parajo M. Kinetic Study of the decomposition of N-chloramines. J Phys Org Chem. 1996;9(June 1995):447–54.
9. How ZT, Buseti F, Linge KL, Kristiana I, Joll CA, Charrois JWA. Analysis of free amino acids in natural waters by liquid chromatography-tandem mass spectrometry. J Chromatogr A [Internet]. 2014;1370:135–46. Available from: <http://dx.doi.org/10.1016/j.chroma.2014.10.040>
10. Ge H, Wallace GG, O’Halloran RAJ. Determination of trace amounts of chloramines by liquid chromatographic separation and amperometric detection. Anal Chim Acta [Internet]. 1990;237(C):149–53. Available from: <http://www.scopus.com/inward/record.url?eid=2-s2.0-0025146596&partnerID=tZOtx3y1>
